# Supplementary material for: Development of an Accurate and Proactive Immunomodulatory Strategy to Improve Bone Substitute Material-Mediated Osteogenesis and Angiogenesis
Source: PubMed Central journal article supplement — Theranostics. 2018 Oct 29;8(19):5482–500. doi: 10.7150/thno.28315 (PMC6276091; doi:10.7150/thno.28315), 2018-10-29
Supplement: thnov08p5482s1.pdf [file thnov08p5482s1.pdf]

## Electronic Supplementary Information

### Development of an Accurate and Proactive Immunomodulatory Strategy to Improve Bone Substitute Material-Mediated Osteogenesis and Angiogenesis

Figure S1. The bone regeneration of unfilled cranial defects at 6 and 12 weeks after surgery. A. Representative superficial, coronal and sagittal images of untreated cranial bone defects at 6 and 12 weeks post-surgery. B. Histological analysis of bone formation at 12 weeks by H&E and Masson's trichrome staining.

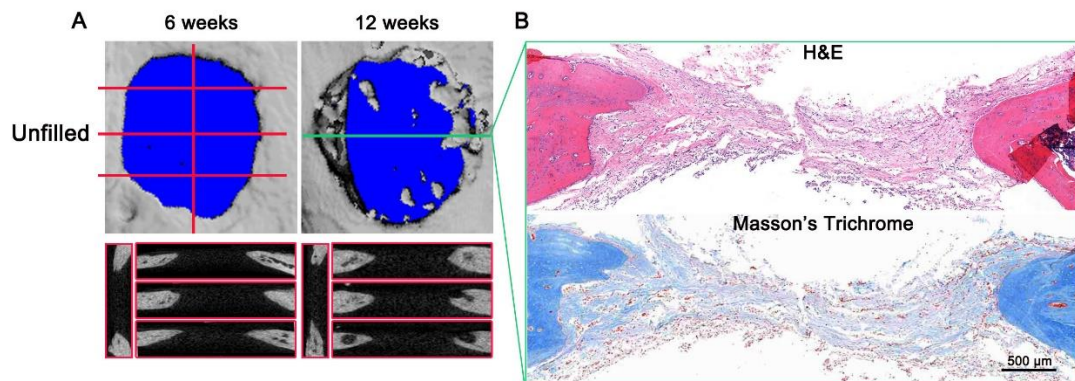

Figure S2. IL-4 treatment does not affect their osteogenic ability of BMSCs. Untreated and IL-4 (10 ng/mL) treated BMSCs were cultured in growth medium or osteogenic induction medium for 14 days. The cells were stained with Alizarin Red and quantified. Undiff: BMSCs cultured in standard medium only. Diff: osteogenic medium. n.s. no significant.

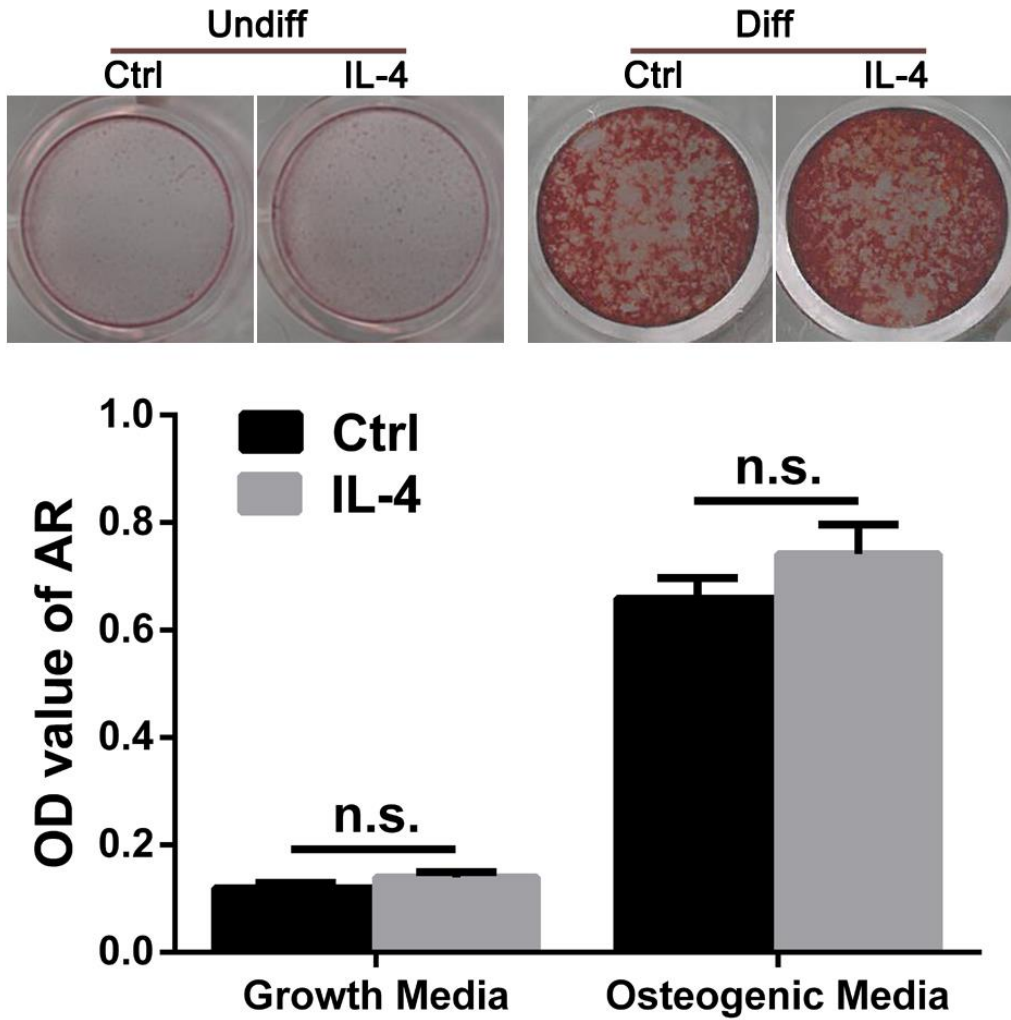

Table S1. Primer sequences used for RT-PCR.

| Gene name       | Sequences of primers for PCR |                           |
|-----------------|------------------------------|---------------------------|
|                 | Forward or Reverse           | Sequence (5'-3')          |
| TNF- $\alpha$   | Forward                      | GTCCATTCCTGAGTTCTG        |
|                 | Reverse                      | GAAAGGTCTGAAGGTAGG        |
| IL-1 $\beta$    | Forward                      | GTATGGGCTGGACTGTTTC       |
|                 | Reverse                      | GCTGTCTGCTCATTACG         |
| IL-6            | Forward                      | GAGGATACCACTCCCAACAGACC   |
|                 | Reverse                      | AAGTGCATCATCGTTGTTTCATACA |
| Retnl- $\alpha$ | Forward                      | CTTTCCTGAGATTCTGCCCCAG    |
|                 | Reverse                      | CACAAGCACACCCAGTAGCA      |
| Arg1            | Forward                      | CAGAAGAATGGAAGAGTCAG      |
|                 | Reverse                      | CAGATATGCAGGGAGTCACC      |
| CD206           | Forward                      | TACAGCTCCACGCTATGGATT     |
|                 | Reverse                      | CACTCTCCCAGTTGAGGTACT     |
| GAPDH           | Forward                      | CACTCACGGCAAATTCAACGGCAC  |
|                 | Reverse                      | GACTCCACGACATACTCAGCAC    |
| ALP             | Forward                      | GAAAGAGAAAGACCCCAGTTAC    |
|                 | Reverse                      | ATACCATCTCCCAGGAACAT      |
| COL1            | Forward                      | CGTGGAACCTGATGTATGCT      |
|                 | Reverse                      | ACTCCTATGACTTCTGCGTCTG    |
| OPN             | Forward                      | CGCATTACAGCAAACACTCAG     |
|                 | Reverse                      | GTCATCGTCGTCGTCATCAT      |
| Runx2           | Forward                      | CGAAATGCCTCTGCTGTTAT      |
|                 | Reverse                      | CGTTATGGTCAAAGTGAACTCT    |
| BMP2            | Forward                      | CGTCAAGCCAAACACAAACA      |
|                 | Reverse                      | AGTCATTCCACCCCACATCA      |
| OCN             | Forward                      | GAACAGACAAGTCCCACACAG     |
|                 | Reverse                      | CAGGTCAGAGAGGCAGAATG      |
| $\beta$ -actin  | Forward                      | CCTCTATGCCAACACAGT        |
|                 | Reverse                      | AGCCACCAATCCACACAG        |
